# Supplementary material for: Assessing the accuracy of low-cost optical particle sensors using a physics-based approach
Source: Copernicus journal article supplement (doi:10.5194/amt-2020-188), 2020-06-24
Supplement: Supplementary file 1 [file amt-2020-188-supplement.pdf]

1 Assessing the accuracy of low-cost optical particle  
2 sensors using a physics-based approach

3

4 David H Hagan<sup>1,2</sup>, Jesse H Kroll<sup>1,3</sup>

5

6 <sup>1</sup>Department of Civil and Environmental Engineering, Massachusetts Institute of Technology,  
7 Cambridge, MA 02139, USA

8 <sup>2</sup>QuantAQ, Inc., Somerville, MA 02143, USA

9 <sup>3</sup>Department of Chemical Engineering, Massachusetts Institute of Technology, Cambridge, MA  
10 02139, USA

11

12 Corresponding Author Emails: david.hagan@quant-aq.com or jhkroll@mit.edu

13

14

15

16

## 1 Supplemental Information

2

### 3 Impact of viewing angle of scattered light collection

4 The viewing angle for a given OPC can strongly influence its ability to correctly count and  
5 size particles. Increasing the viewing angle typically leads to a larger fraction of the  
6 incident light being collected which can be helpful when inexpensive light detectors are  
7 being used. In addition to the total signal of the scattered light, it can also lower the  
8 influence of the Mie resonance by integrating over a wider degree. Figure S1 shows the  
9 impact that widening the viewing angle can have on an OPC with the same laser  
10 wavelength (658 nm) – the smallest viewing angle (blue) collects the least amount of light  
11 and shows the largest impact from the Mie resonance, whereas the red line, which has a  
12 viewing angle similar to that of a nephelometer, shows the least impact from the Mie  
13 resonance and collects the most light.

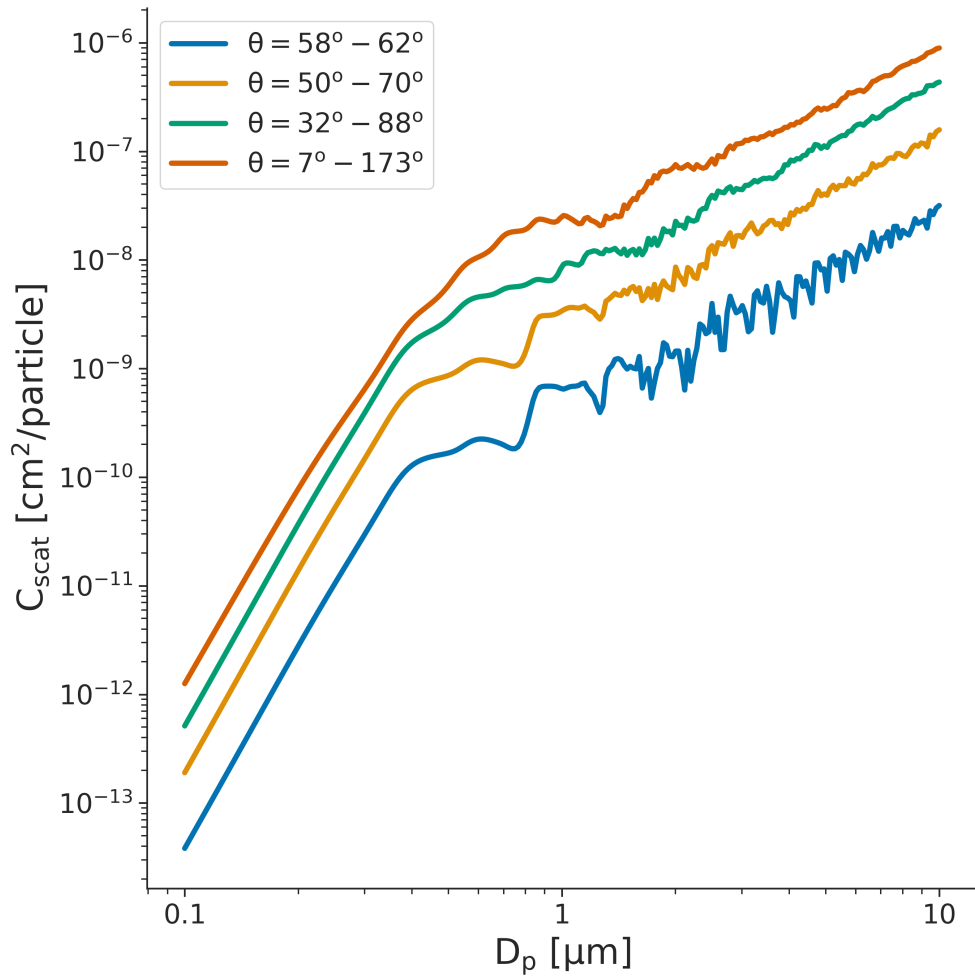

1  
2  
3  
4  
5  
6  
7

**Figure S1.** The amount of scattered light changes as a function of the OPC's viewing angle for a given incident laser wavelength. Above, the blue line depicts the total scattered light collected for a photometer-like instrument with a very narrow viewing angle. As the viewing angle is widened, the total amount of scattered light collected increases and the effect of the Mie resonance decreases.
